# Supplementary material
Source: PubMed Central journal article supplement (PMC10570910)
Supplement: jamaophthalmol-e234475-s002.pdf [file jamaophthalmol-e234475-s002.pdf]

## Data Sharing Statement

Oke. Vision Testing for Adolescents in the US. *JAMA Ophthalmol.* Published October 12, 2023.  
doi:10.1001/jamaophthalmol.2023.4475

### Data

**Data available:** No

### Additional Information

**Explanation for why data not available:** NSCH data is publicly available.
